# Supplementary material for: The Microarchitecture of Pancreatic Cancer as Measured by Diffusion-Weighted Magnetic Resonance Imaging Is Altered by T Cells with a Tumor Promoting Th17 Phenotype
Source: MDPI journal article supplement (doi:10.3390/ijms21010346), 2020-01-05
Supplement: s1 [file s1]

Supplementary Materials:

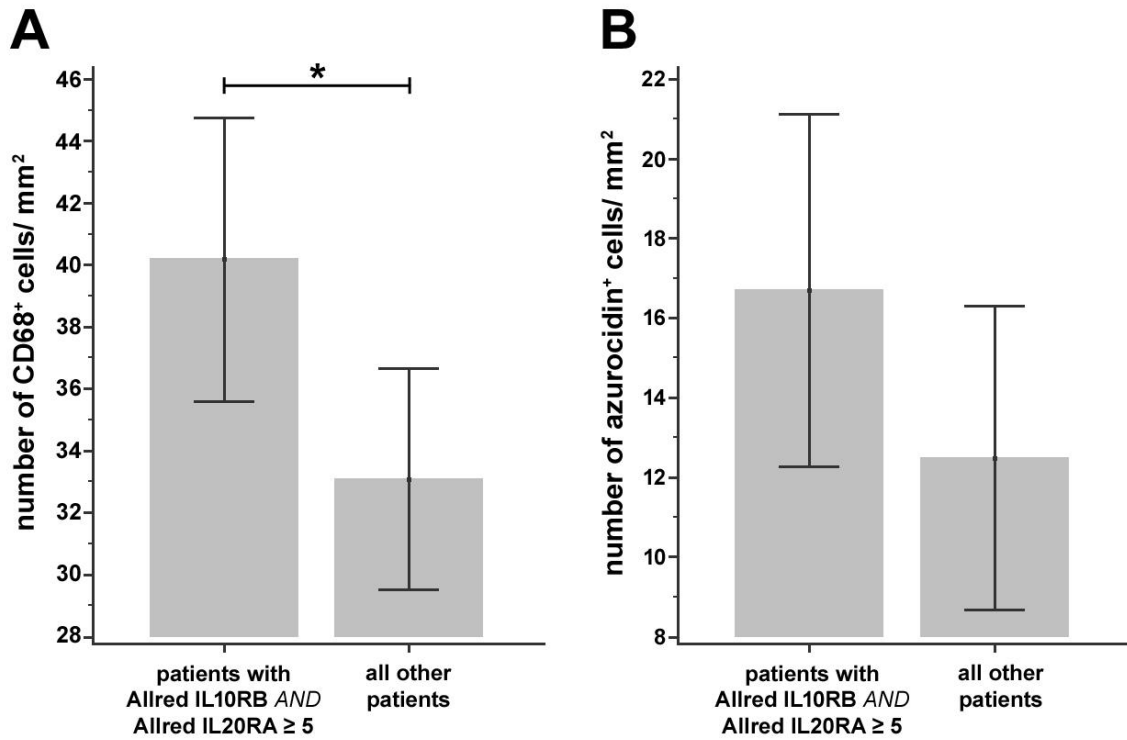

**Supplementary Figure 1. Inflammation depending on expression of IL10RB and IL20RA.** A) Number of CD68<sup>+</sup> cells/mm<sup>2</sup> was higher in patients with Allred IL10RB AND Allred IL20RA compared to all other patients. B) Azurocidin<sup>+</sup> infiltrate was higher in patients with Allred IL10RB AND Allred IL20RA compared to all other patients. Differences that are statistically different ( $p < 0.05$ ) according to the Mann-Whitney U test are marked with \*.
